# Supplementary material
Source: PubMed Central journal article supplement (PMC1464335)

# Fig. 23

## A

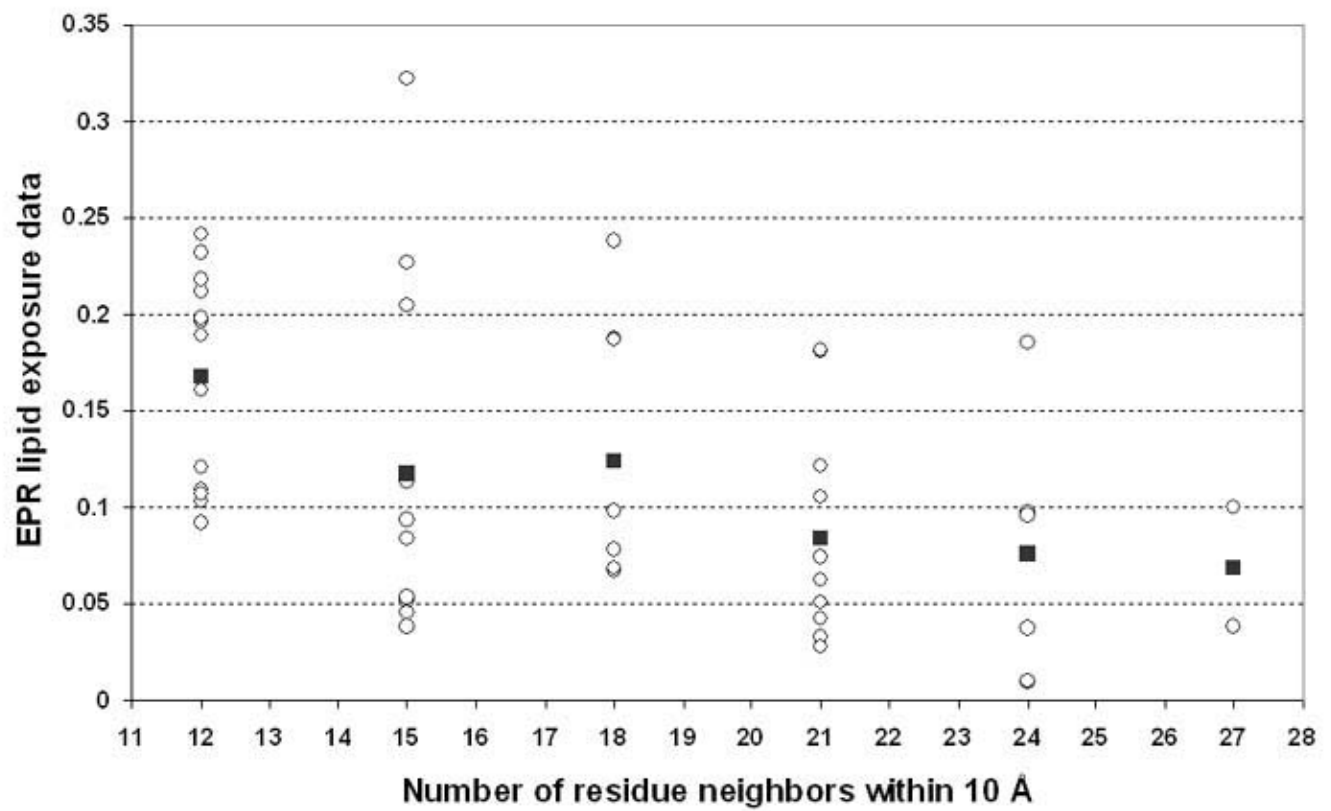

## B

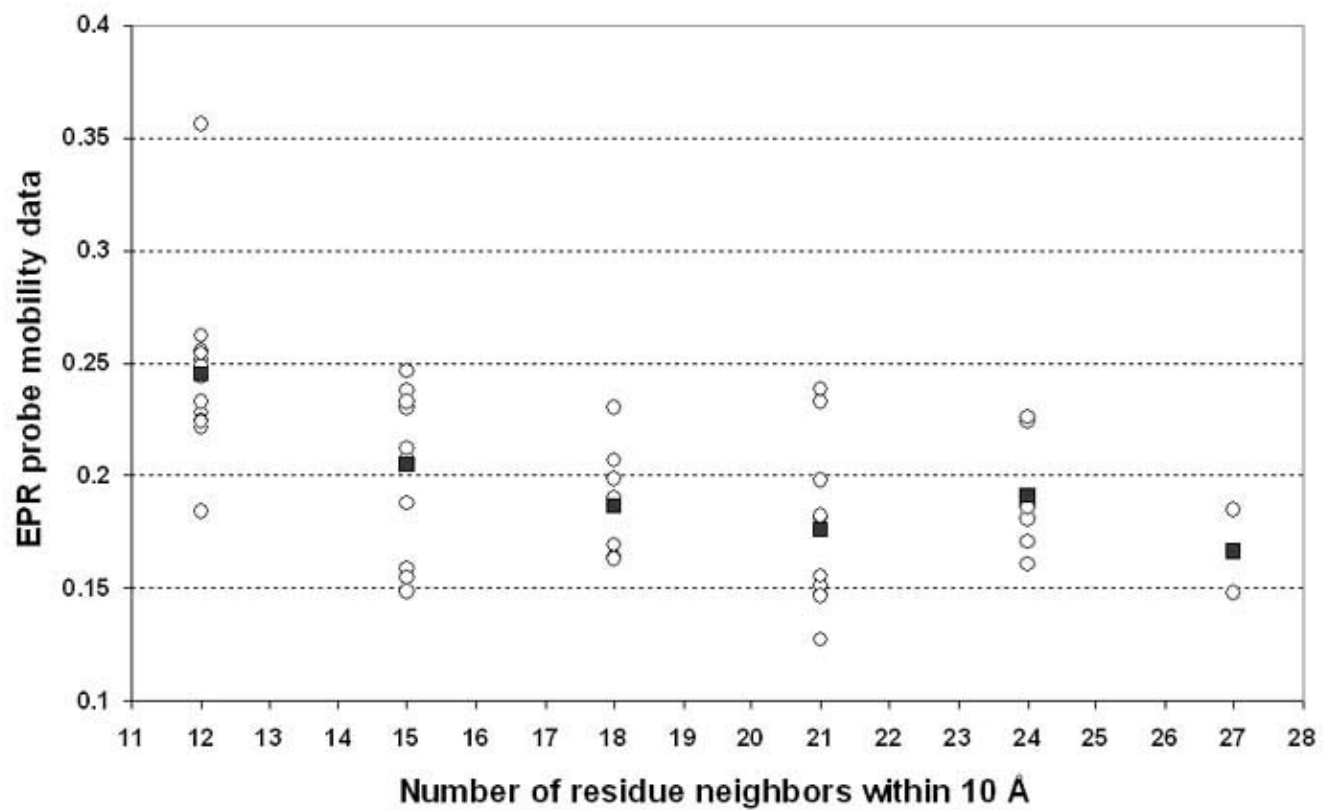

Supplement: pnas_0602350103_18.pdf [file pnas_0602350103_18.pdf]
